# Supplementary material for: Socioeconomic Status, Protective Factors, and Mental Health Problems in Transition from Adolescence to Emerging Adulthood: Results of the Longitudinal BELLA Study
Source: Springer Nature journal article supplement (doi:10.1007/s10578-023-01582-1), 2023-08-26
Supplement: MOESM1 [file 10578_2023_1582_MOESM1_ESM.pdf]

Supplementary Table 1. *Comparison of adolescents only participated at first measurement point and adolescents of the longitudinal study sample.*

|                                | adolescents only participated at<br>t0 ( <i>n</i> = 650) |          |           | study sample: participated at t0<br>and t1 ( <i>n</i> = 426) |          |           | χ <sup>2</sup> -tests | t-test<br>(unpaired) |
|--------------------------------|----------------------------------------------------------|----------|-----------|--------------------------------------------------------------|----------|-----------|-----------------------|----------------------|
|                                | <i>n</i> (%)                                             | <i>M</i> | <i>SD</i> | <i>n</i> (%)                                                 | <i>M</i> | <i>SD</i> | Cramer's<br>V         | Cohen's <i>d</i>     |
| Gender                         | 650                                                      |          |           | 426                                                          |          |           | <b>.119*</b>          |                      |
| male                           | 349 (53.7)                                               |          |           | 177 (41.5)                                                   |          |           |                       |                      |
| female                         | 301 (46.3)                                               |          |           | 249 (58.5)                                                   |          |           |                       |                      |
| Age in adolescence             | 650                                                      | 14.98    | 1.38      | 426                                                          | 15.17    | 1.28      |                       | .145 <sup>n.s.</sup> |
| Migration background           | 650                                                      |          |           | 426                                                          |          |           | .045 <sup>n.s.</sup>  |                      |
| migration background           | 43 (6.6)                                                 |          |           | 19 (4.5)                                                     |          |           |                       |                      |
| non-migration background       | 607 (93.4)                                               |          |           | 407 (95.5)                                                   |          |           |                       |                      |
| SES                            | 648                                                      | 12.83    | 3.71      | 426                                                          | 13.23    | 3.42      |                       | .112 <sup>n.s.</sup> |
| Self-efficacy                  | 559                                                      | 20.79    | 4.13      | 426                                                          | 20.81    | 4.21      |                       | .005 <sup>n.s.</sup> |
| Family climate                 | 554                                                      | 15.87    | 4.62      | 426                                                          | 15.88    | 4.57      |                       | .003 <sup>n.s.</sup> |
| Social support                 | 536                                                      | 8.42     | 1.69      | 426                                                          | 8.46     | 1.63      |                       | .028 <sup>n.s.</sup> |
| MHP in adolescence             | 607                                                      | 9.44     | 4.26      | 426                                                          | 9.10     | 4.40      |                       | .079 <sup>n.s.</sup> |
| MHP in emerging adulthood (t1) | -                                                        | -        | -         | 426                                                          | 7.51     | 6.05      | -                     | -                    |

*Note.* t0 = first measurement point (2009-2012); t1 = 5-year follow-up (2014-2017); SES = socioeconomic status; MHP = mental health problems; n.s. = non-significant; \* *p* ≤ .01 (with Bonferroni-Holm correction); significant effects in bold.
